# Supplementary material for: The Anxiolytic Drug Tandospirone Enhances Cisplatin Efficacy by Reducing Tumor Cell Cholesterol Levels: Dual Roles in Emotional Distress Management and Chemosensitization for NSCLC Patients
Source: Research Square preprint supplement (doi:10.21203/rs.3.rs-7149599/v1), 2025-07-28
Supplement: Supplementary file 1 [file a50c832fd4ffcccdae69f69f.pdf]

**Supplementary Table 1:** Primer sequences used in this study.

| Gene           | Forward (5'-3')      | Reverse (5'-3')      |
|----------------|----------------------|----------------------|
| HMGR           | AGGTGGTGCTGTCCTGGAAT | TCCATGTCGCCGTCACATC  |
| SREBP2         | GACCTGGAGCCATGGATTGC | AGGCGAGGCTTCTGGAAGTG |
| $\beta$ -ACTIN | CTCCATCCTGGCCTCGCTGT | GCTGTCACCTTCACCGTTCC |

**Supplementary Table 2:** Characteristics of treatment for ED in patients with NSCLC. \*Statistically significant values.

| Variables              | Total (n = 1185) | ED (n = 382) | No ED (n = 803) | P value |
|------------------------|------------------|--------------|-----------------|---------|
| Treatment-1 (%)        |                  |              |                 | <0.001* |
| No treatment           | 602 (50.8)       | 80 (20.9)    | 522 (65.0)      |         |
| Chemotherapy           | 84 (7.1)         | 61 (16.0)    | 23 (2.9)        |         |
| Chemotherapy + Other   | 246 (20.8)       | 163 (42.7)   | 83 (10.3)       |         |
| Other                  | 253 (21.4)       | 78 (20.4)    | 175 (21.8)      |         |
| Treatment-2 (%)        |                  |              |                 | <0.001* |
| No treatment           | 602 (50.8)       | 80 (20.9)    | 522 (65.0)      |         |
| Inclusive chemotherapy | 330 (27.8)       | 224 (58.6)   | 106 (13.2)      |         |
| Excluding chemotherapy | 253 (21.4)       | 78 (20.4)    | 175 (21.8)      |         |

**Supplementary Table 3:** Multivariate analysis for independent predictors of ED in NSCLC patients. Chemotherapy vs. No treatment. \*Statistically significant values.

| Variables    | Odds Ratio | 95%CI      | P value |
|--------------|------------|------------|---------|
| Diabetes     | 2.30       | 1.50–3.52  | 0.005*  |
| Sex          | 1.24       | 1.14–1.34  | 0.013*  |
| Chemotherapy | 8.64       | 2.99–14.29 | <0.001* |

**Supplementary Table 4:** Multivariate analysis for independent predictors of ED in NSCLC patients. Inclusive chemotherapy vs. No treatment. \*Statistically significant values.

| Variables              | Odds Ratio | 95%CI     | P value |
|------------------------|------------|-----------|---------|
| Diabetes               | 2.56       | 1.67–3.45 | 0.001*  |
| Sex                    | 1.31       | 1.18–1.44 | 0.003*  |
| Inclusive chemotherapy | 6.52       | 3.07–9.97 | <0.001* |

**Supplementary Figure**

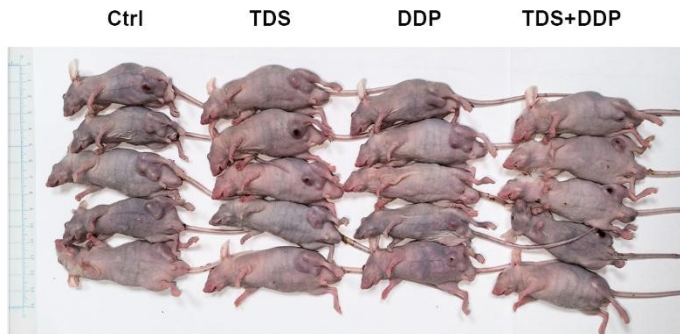

**Supplementary Fig. 1** The effects of tandospirone combined with cisplatin on tumor size are assessed using the mouse xenograft model (n = 5).

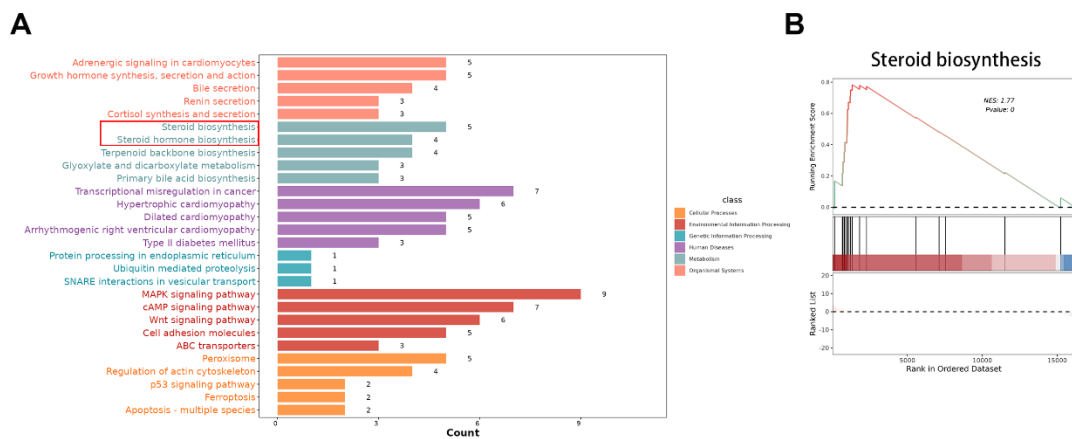

**Supplementary Fig. 2** Tandospirone regulates steroid synthesis (A) KEGG pathway enrichment analysis was conducted on differentially expressed genes. (B) GSEA of TDS and Ctrl groups by using a steroid biosynthesis

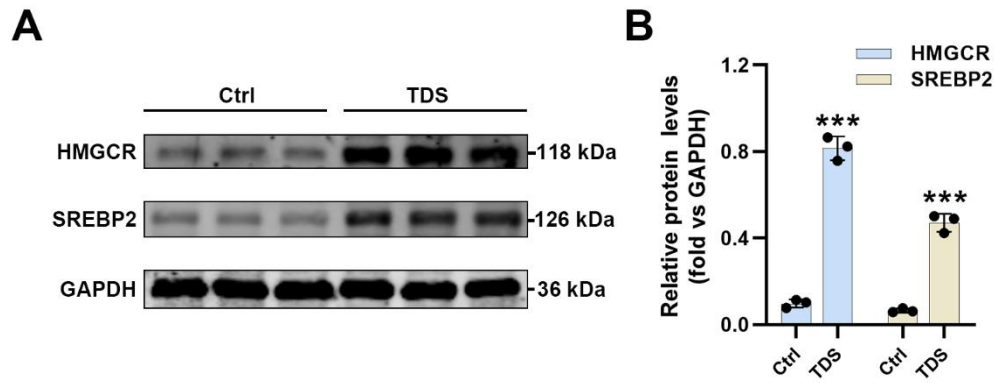

**Supplementary Fig. 3** Tansospirone up-regulated the expression of HMGCR and SREBP2 in H1299 cells. (A, B) Western blotting revealed that the levels of HMGCR and SREBP2 are increased in H1299 cells treated with TDS. Data are expressed as the mean  $\pm$  SD,  $n = 3$ , \* $P < 0.05$ , \*\* $P < 0.01$ , \*\*\* $P < 0.001$ .

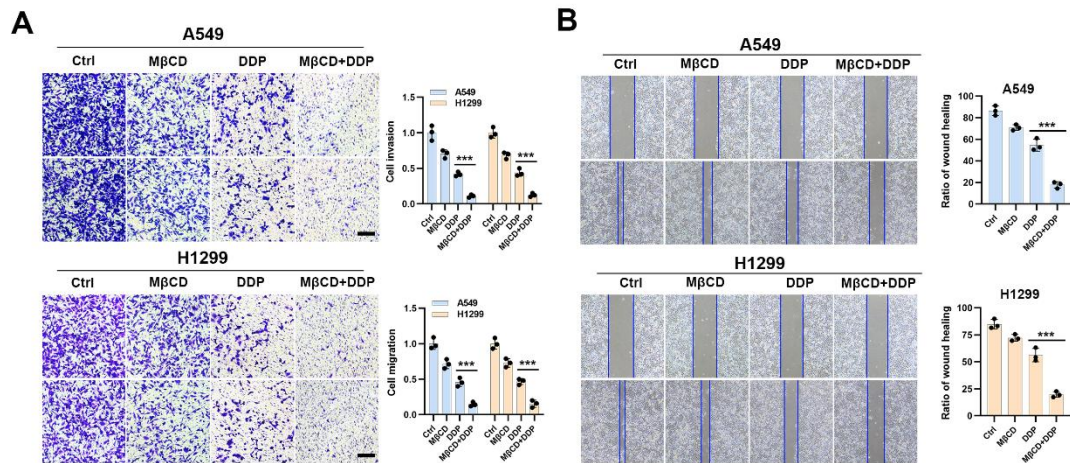

**Supplementary Fig. 4** MβCD enhanced the invasion and migration effect of DDP on lung cancer cells. (A) Migration and invasion of A549 and H1299 cells treated with MβCD combined with DDP. Quantitative analysis is presented on the right ( $n = 3$ ), Scale bar = 100  $\mu\text{m}$ . (D) The wound healing assay revealed that MβCD enhances DDP-induced inhibition of A549 and H1299 cell migration. Quantitative analysis is presented on the right ( $n = 3$ ).
